# Supplementary material for: A high-resolution map of the Nile tilapia genome: a resource for studying cichlids and other percomorphs
Source: PubMed Central journal article supplement (PMC3441813; doi:10.1186/1471-2164-13-222), 2012-06-06

LG1

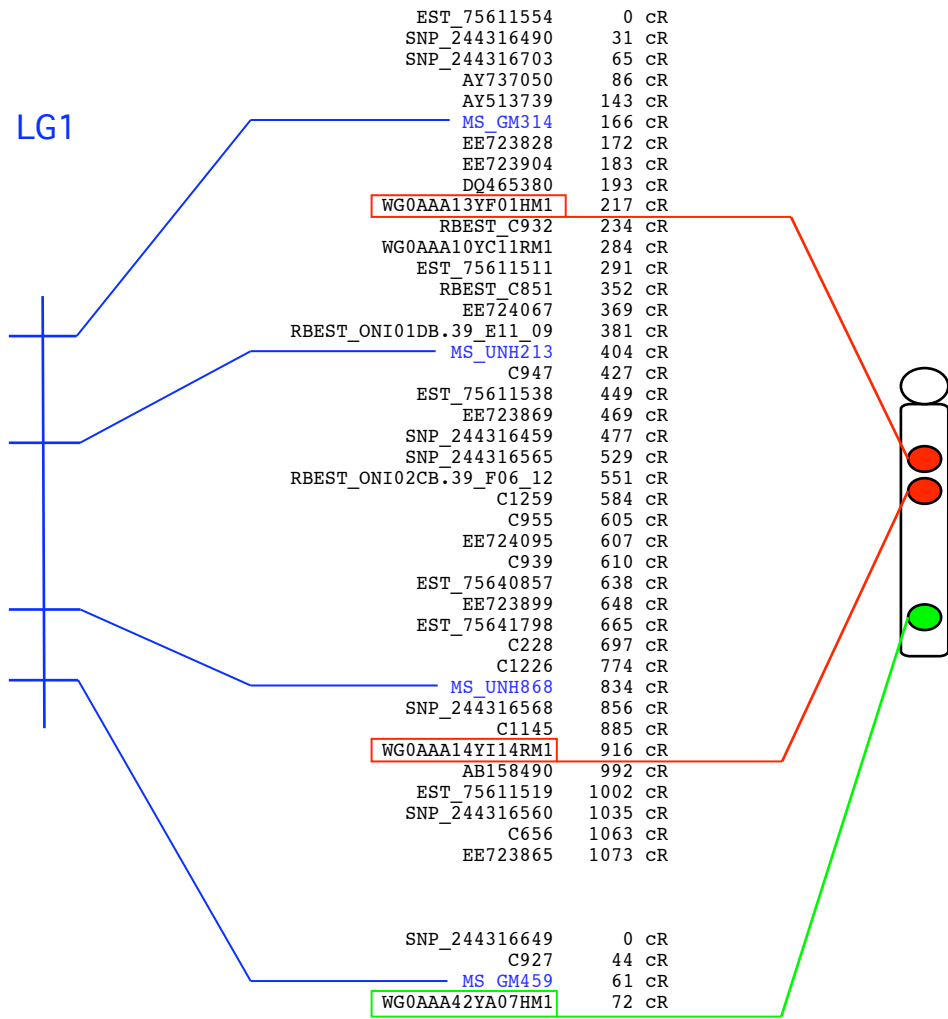

LG2

|  |                         |      |    |
|--|-------------------------|------|----|
|  | C136                    | 0    | cR |
|  | SNP_244316542           | 14   | cR |
|  | EE724126                | 62   | cR |
|  | EST_75611782            | 69   | cR |
|  | EST_75640846            | 129  | cR |
|  | RBEST_ONI03AA.39_A03_01 | 175  | cR |
|  | RBEST_ONI02DC.39_C01_05 | 179  | cR |
|  | EST_75641174            | 186  | cR |
|  | WG0AAA2YH18HM1_FGF24    | 192  | cR |
|  | WG0AAA33YA15HM1_TEX14   | 220  | cR |
|  | SNP_244316562           | 251  | cR |
|  | RBEST_ONI04JD.39_F12_12 | 295  | cR |
|  | EST_75611607            | 353  | cR |
|  | C1279                   | 374  | cR |
|  | RBEST_C805              | 391  | cR |
|  | EE723892                | 398  | cR |
|  | C146                    | 451  | cR |
|  | RBEST_ONI05BC.39_G12_14 | 465  | cR |
|  | MS_GM223                | 476  | cR |
|  | EST_75611654            | 487  | cR |
|  | C1028                   | 516  | cR |
|  | EST_75611734            | 520  | cR |
|  | AY522594                | 534  | cR |
|  | SNP_244316497           | 570  | cR |
|  | C344                    | 594  | cR |
|  | EE724098                | 618  | cR |
|  | C1015                   | 644  | cR |
|  | EE723860                | 645  | cR |
|  | C289                    | 648  | cR |
|  | C1192                   | 651  | cR |
|  | D66874                  | 669  | cR |
|  | RBEST_ONI05GA.39_E01_09 | 672  | cR |
|  | WG0AAA30YG19HM1_ATRX    | 674  | cR |
|  | AB245405                | 684  | cR |
|  | MS_GM166                | 700  | cR |
|  | C945                    | 711  | cR |
|  | AX804467                | 715  | cR |
|  | EE723936                | 724  | cR |
|  | EST_75611496            | 740  | cR |
|  | EE724028                | 788  | cR |
|  | C375                    | 798  | cR |
|  | SNP_244316573           | 852  | cR |
|  | C234                    | 874  | cR |
|  | SNP_244316735           | 1038 | cR |

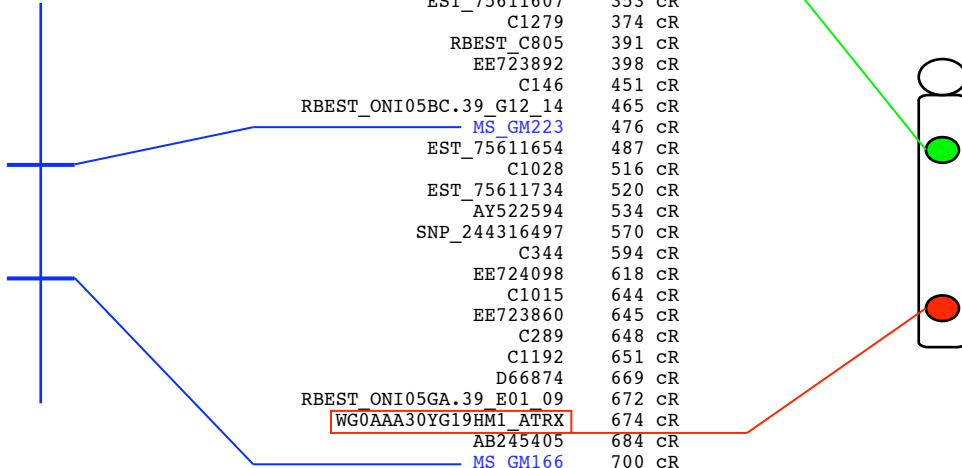

LG3

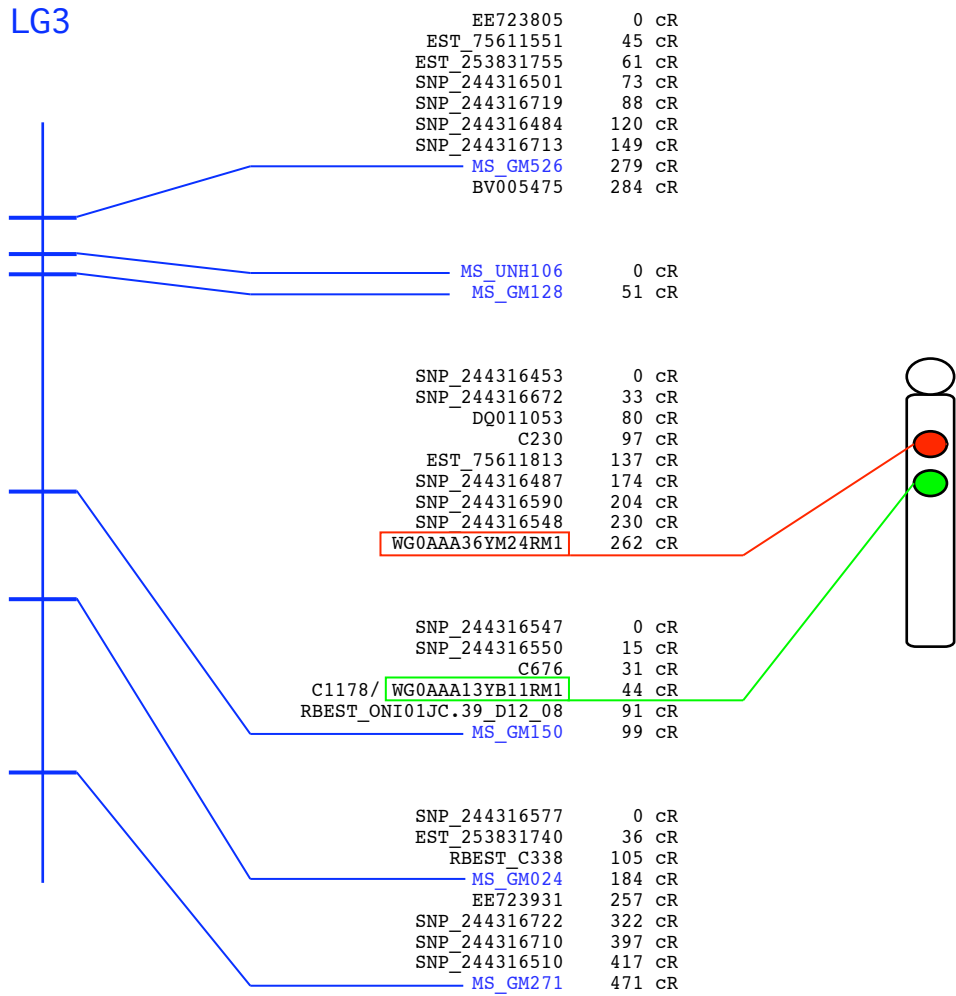

LG4

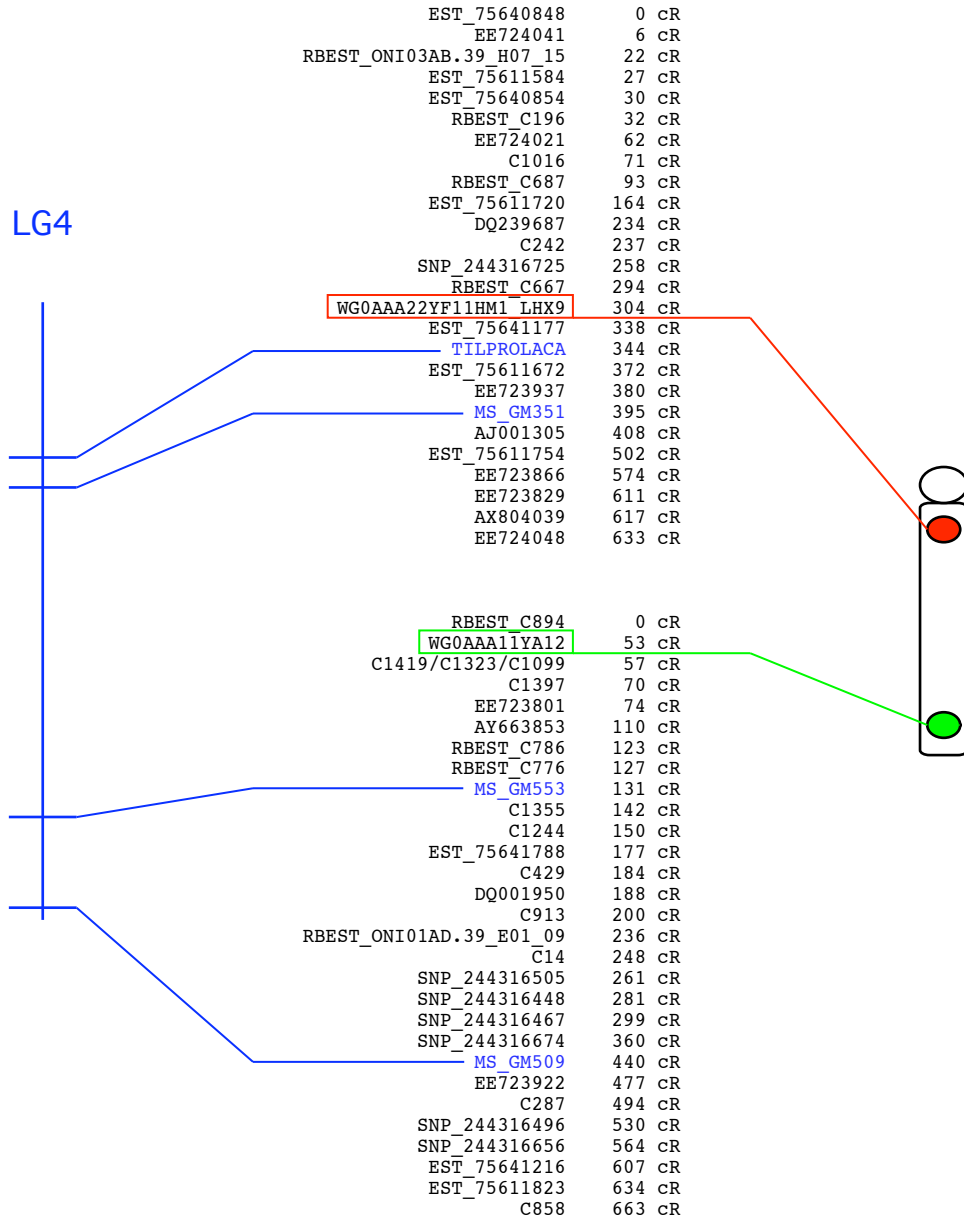

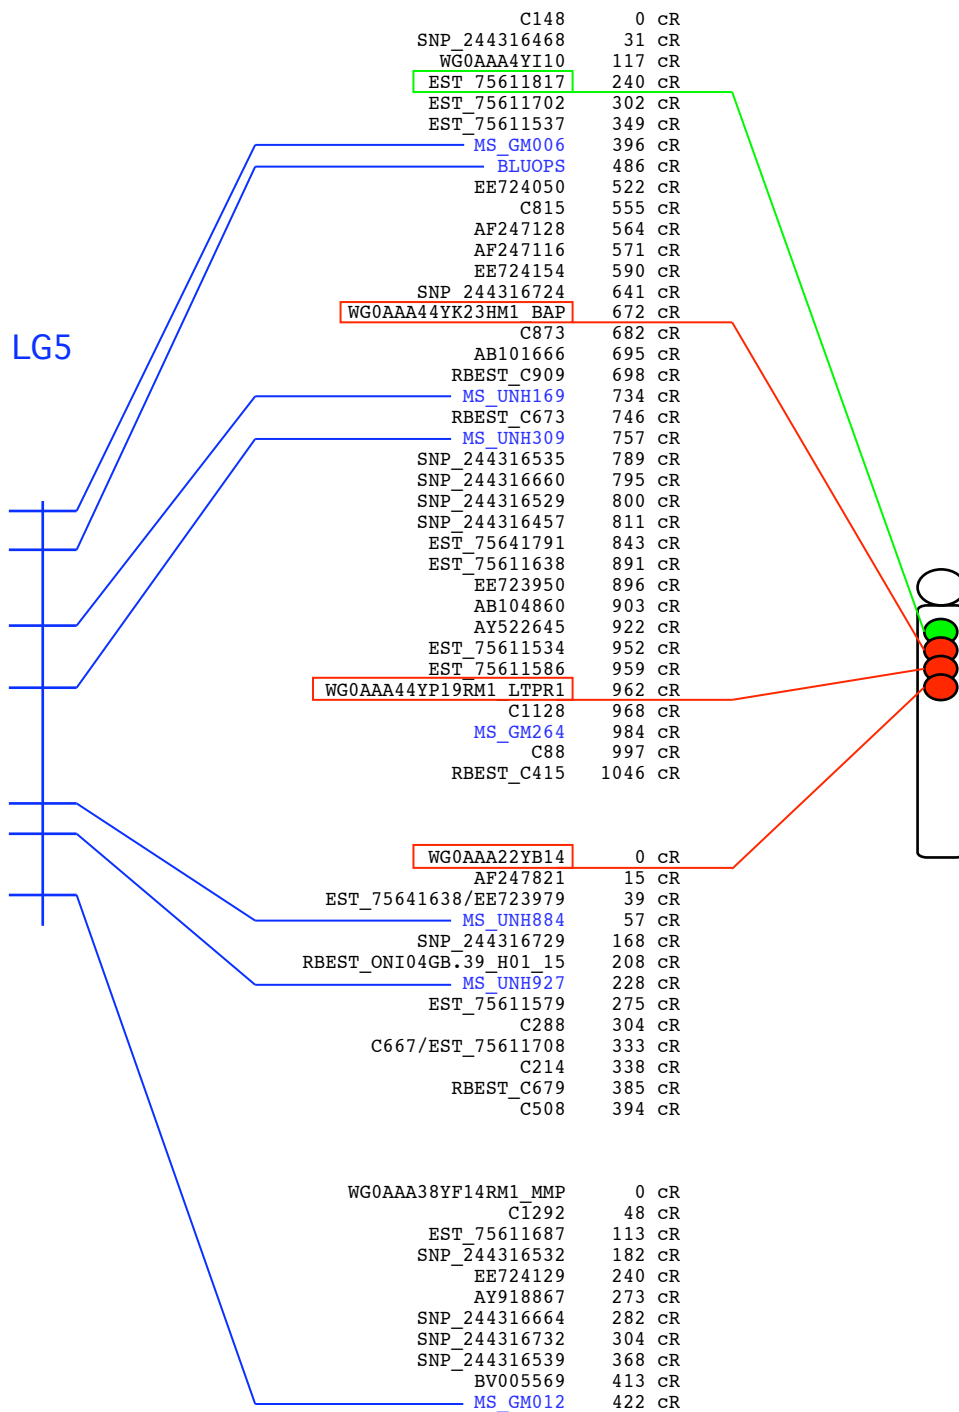

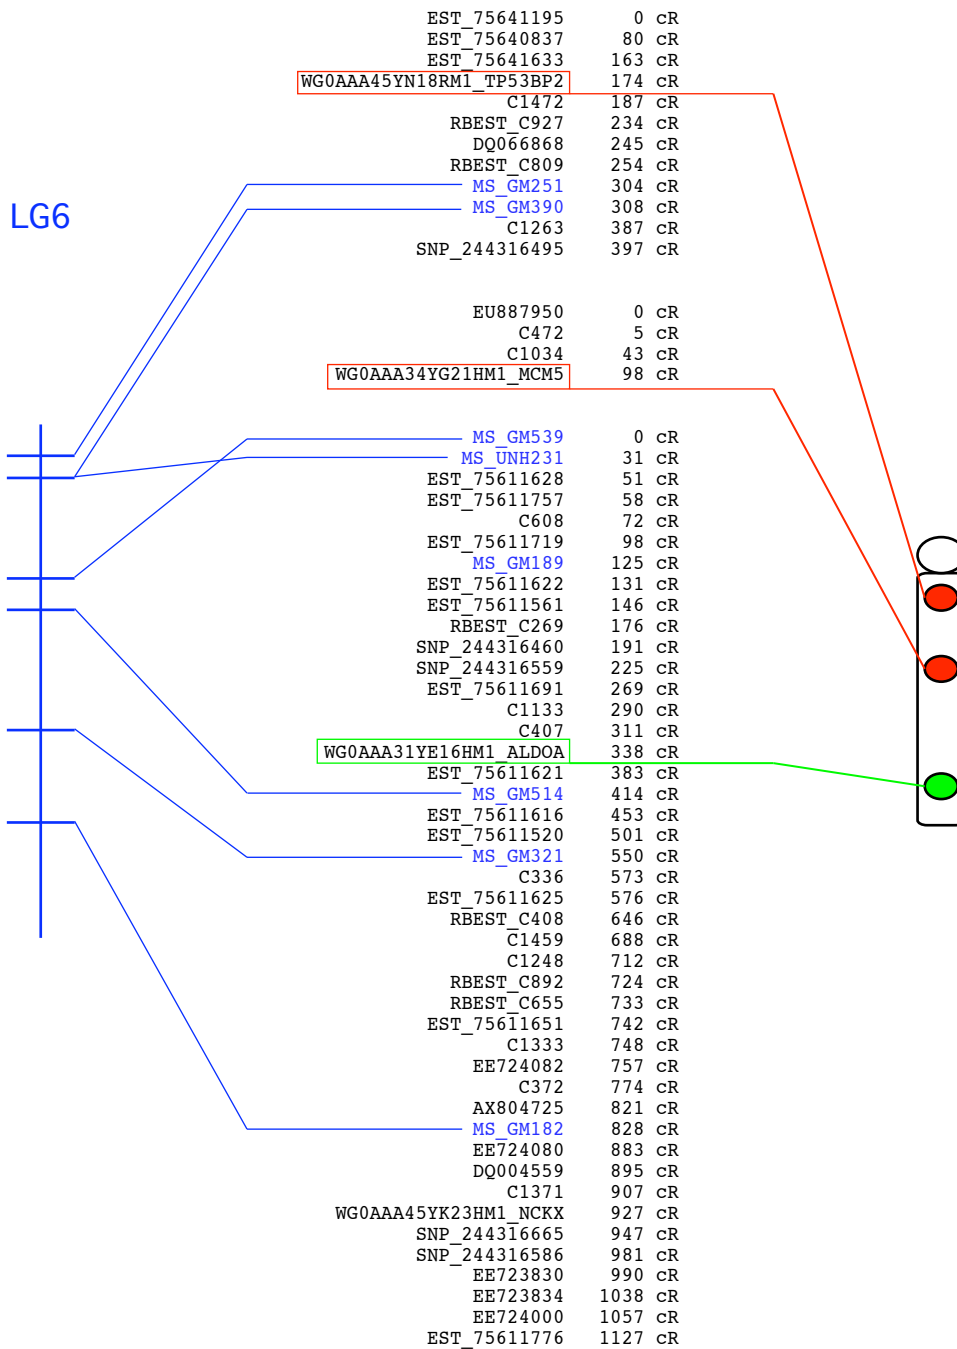

LG7

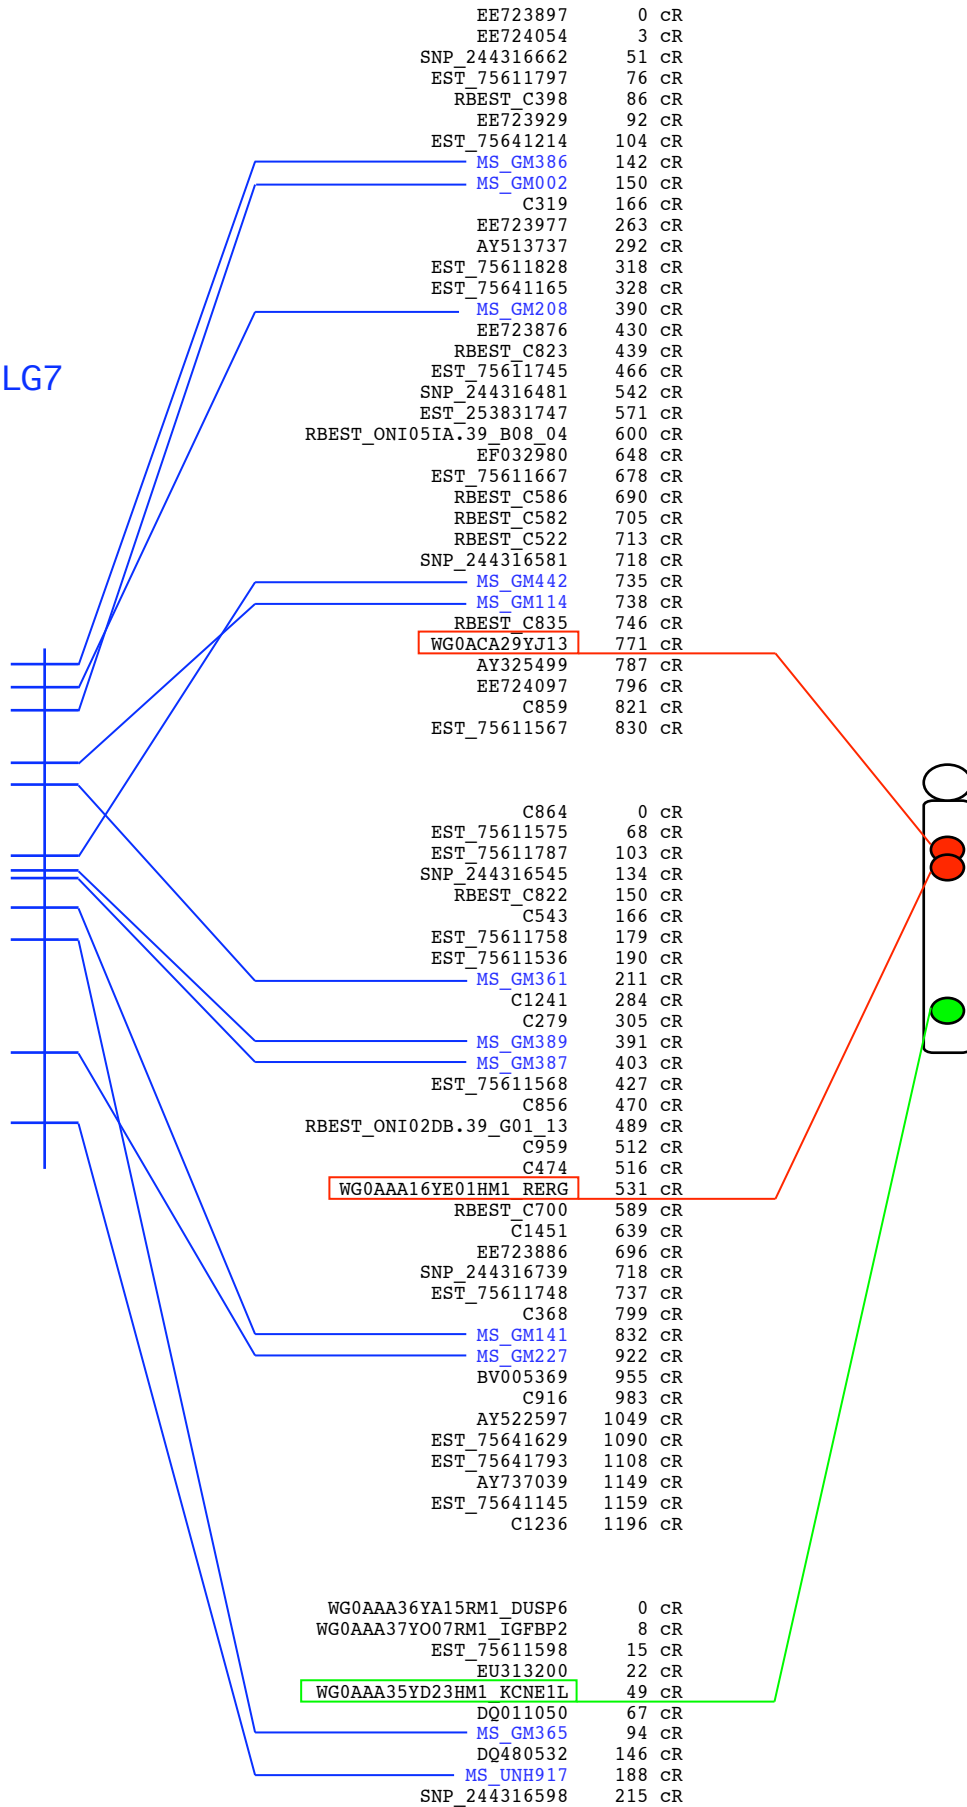

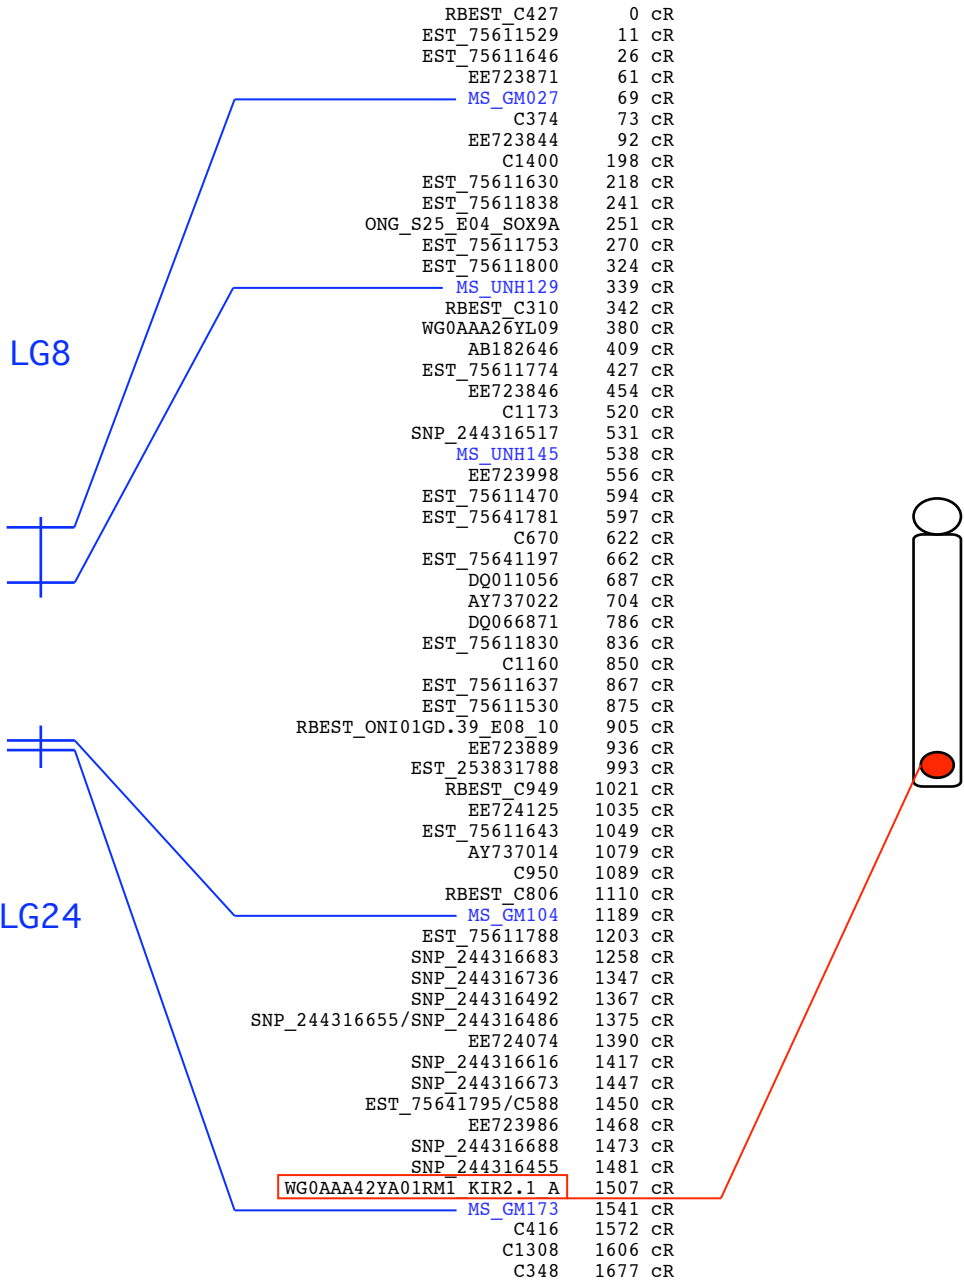



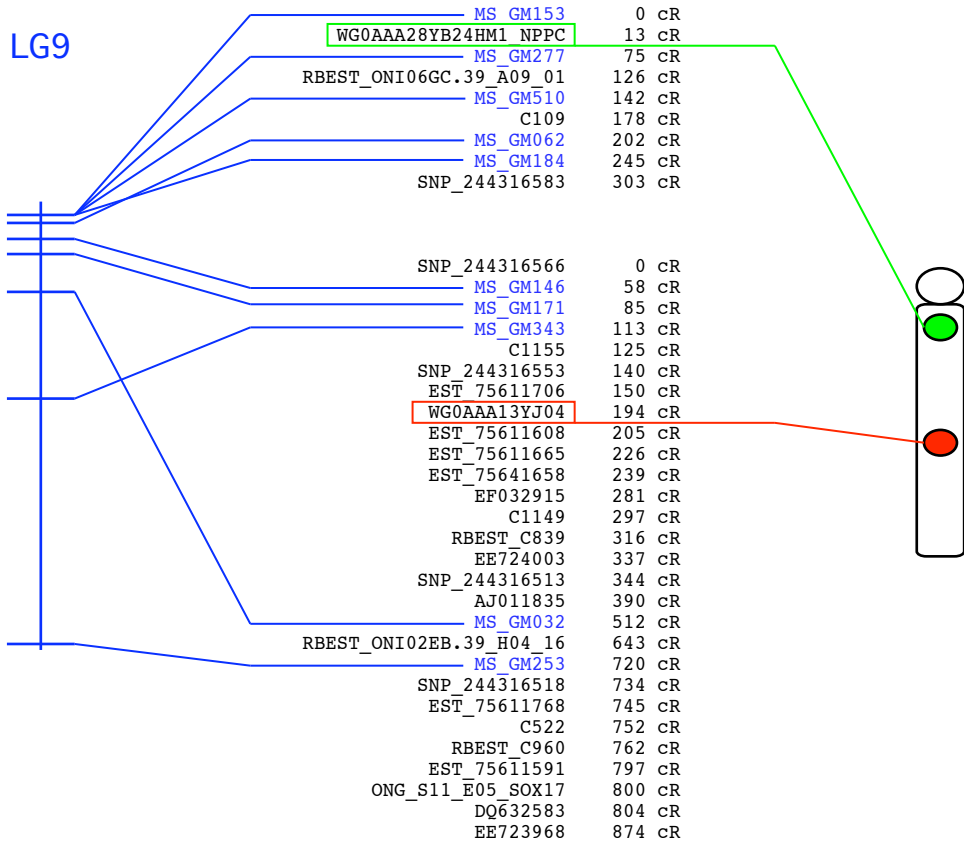

LG10

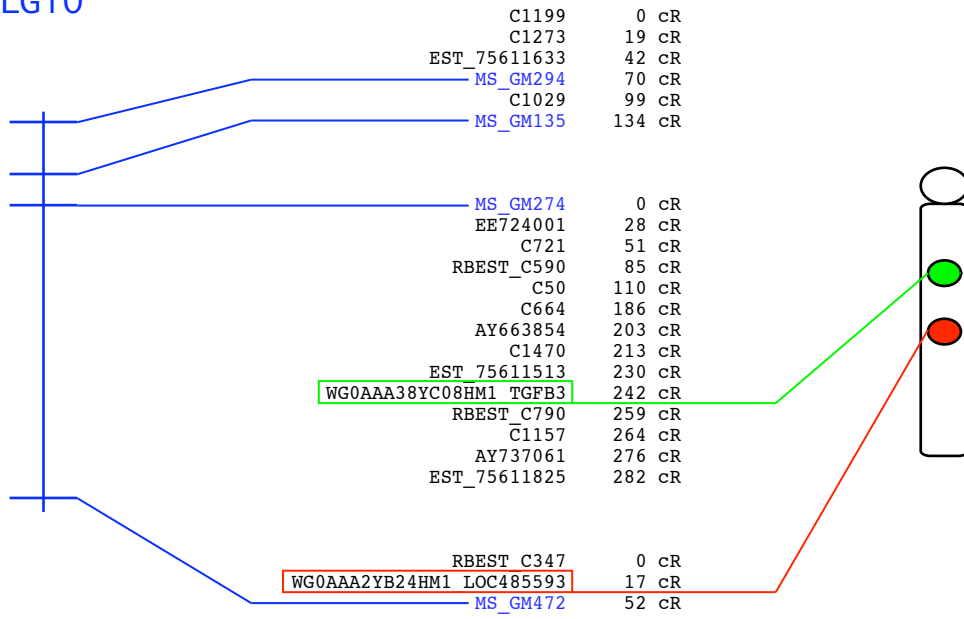

LG11

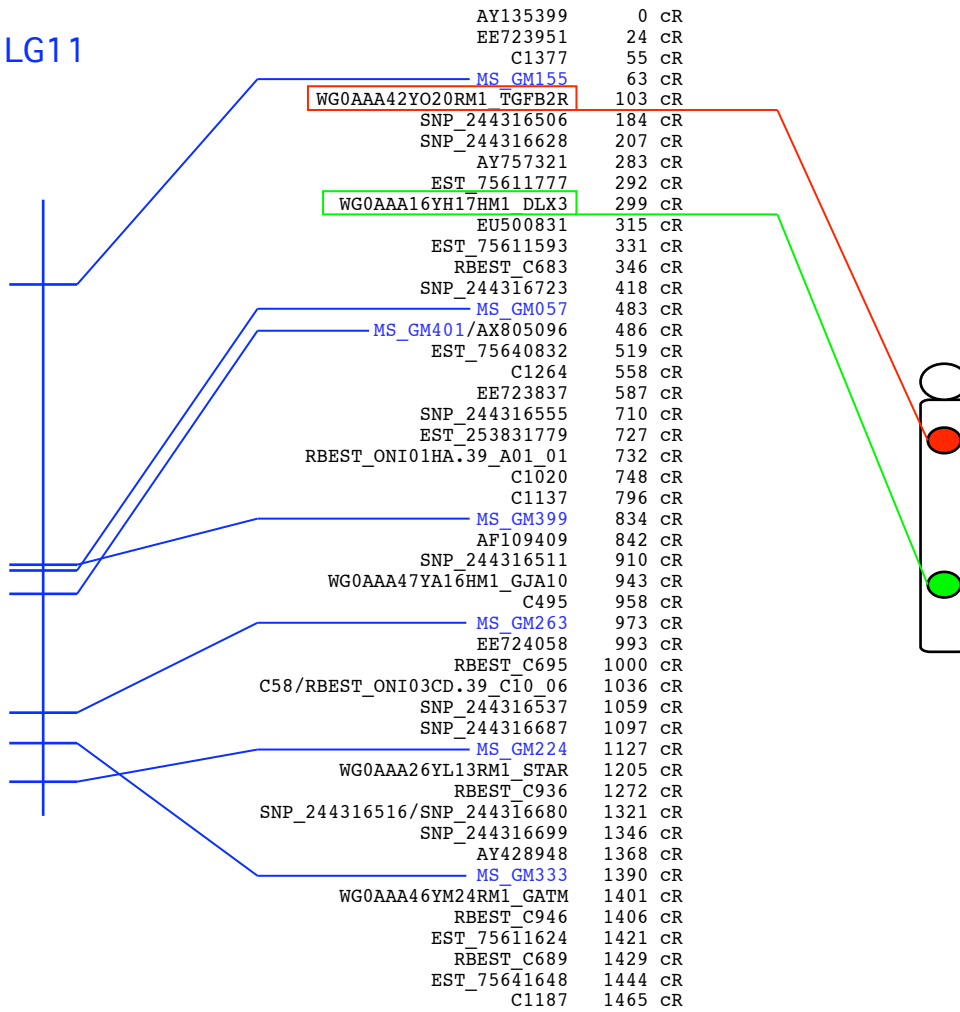

LG12

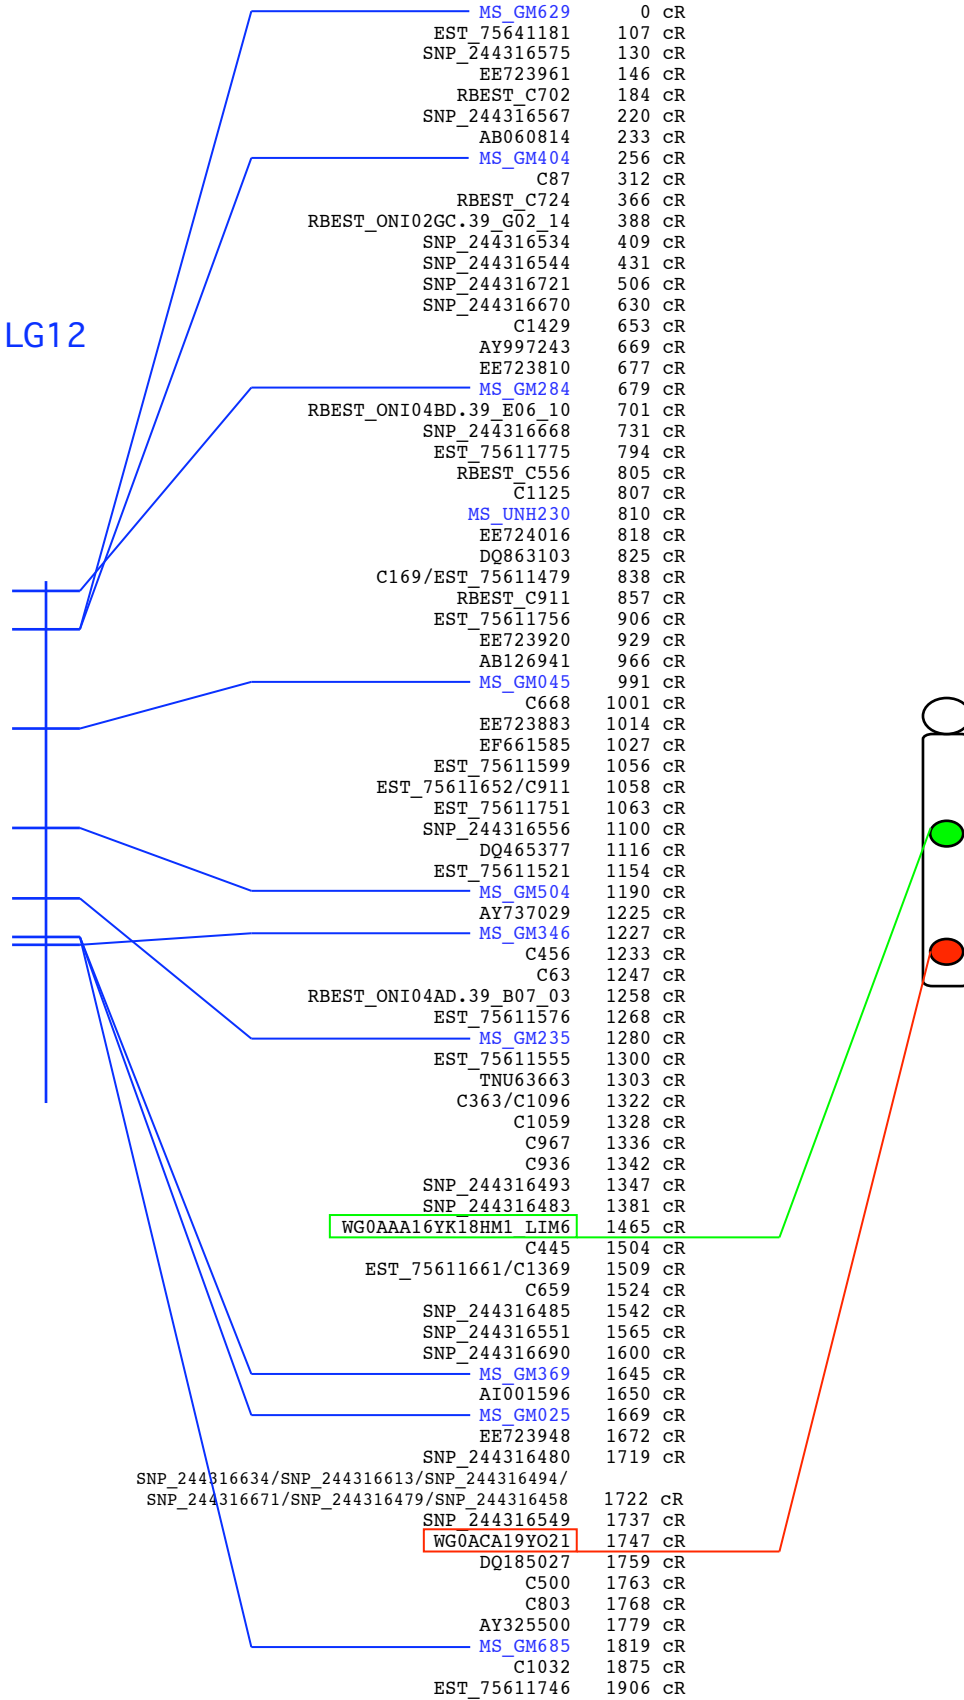

LG13

|                             |     |    |
|-----------------------------|-----|----|
| RBEST_C966                  | 0   | CR |
| EST_253831742               | 14  | CR |
| AY522636                    | 23  | CR |
| C788                        | 52  | CR |
| MS_GM452                    | 133 | CR |
| SNP_244316521               | 169 | CR |
| EE723879                    | 211 | CR |
| C626                        | 258 | CR |
| SNP_244316689               | 281 | CR |
| SNP_244316646/SNP_244316512 | 298 | CR |
| SNP_244316584               | 302 | CR |
| SNP_244316625               | 337 | CR |
| SNP_244316531               | 344 | CR |
| EST_75611500                | 390 | CR |

|                         |     |    |
|-------------------------|-----|----|
| MS_GM503                | 0   | CR |
| AY737019                | 47  | CR |
| WG0AAA41YB15RM1         | 83  | CR |
| SNP_244316638           | 163 | CR |
| AB048944                | 232 | CR |
| C1198                   | 235 | CR |
| RBEST_ONI01BD.39_C11_05 | 256 | CR |
| EST_75611581            | 270 | CR |
| C886                    | 332 | CR |
| RBEST_C956              | 383 | CR |
| SNP_244316606           | 390 | CR |
| SNP_244316607           | 407 | CR |
| C1334                   | 438 | CR |
| EST_75611645            | 450 | CR |
| EST_75611703            | 466 | CR |
| AB041763                | 476 | CR |

|                            |     |    |
|----------------------------|-----|----|
| SNP_244316523              | 0   | CR |
| AY170326                   | 8   | CR |
| C436                       | 24  | CR |
| C1266                      | 38  | CR |
| C897                       | 50  | CR |
| EST_75611649               | 85  | CR |
| EE724036                   | 90  | CR |
| AX804099                   | 108 | CR |
| EE724014                   | 134 | CR |
| RBEST_C359                 | 150 | CR |
| SNP_244316600              | 166 | CR |
| SNP_244316526              | 190 | CR |
| EF081463                   | 314 | CR |
| C876/WG0AAA35YG16HM1_CLIC4 | 317 | CR |
| EST_75611653               | 351 | CR |
| MS_GM535                   | 400 | CR |
| EE723989                   | 426 | CR |
| MS_GM373                   | 483 | CR |

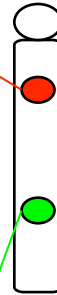

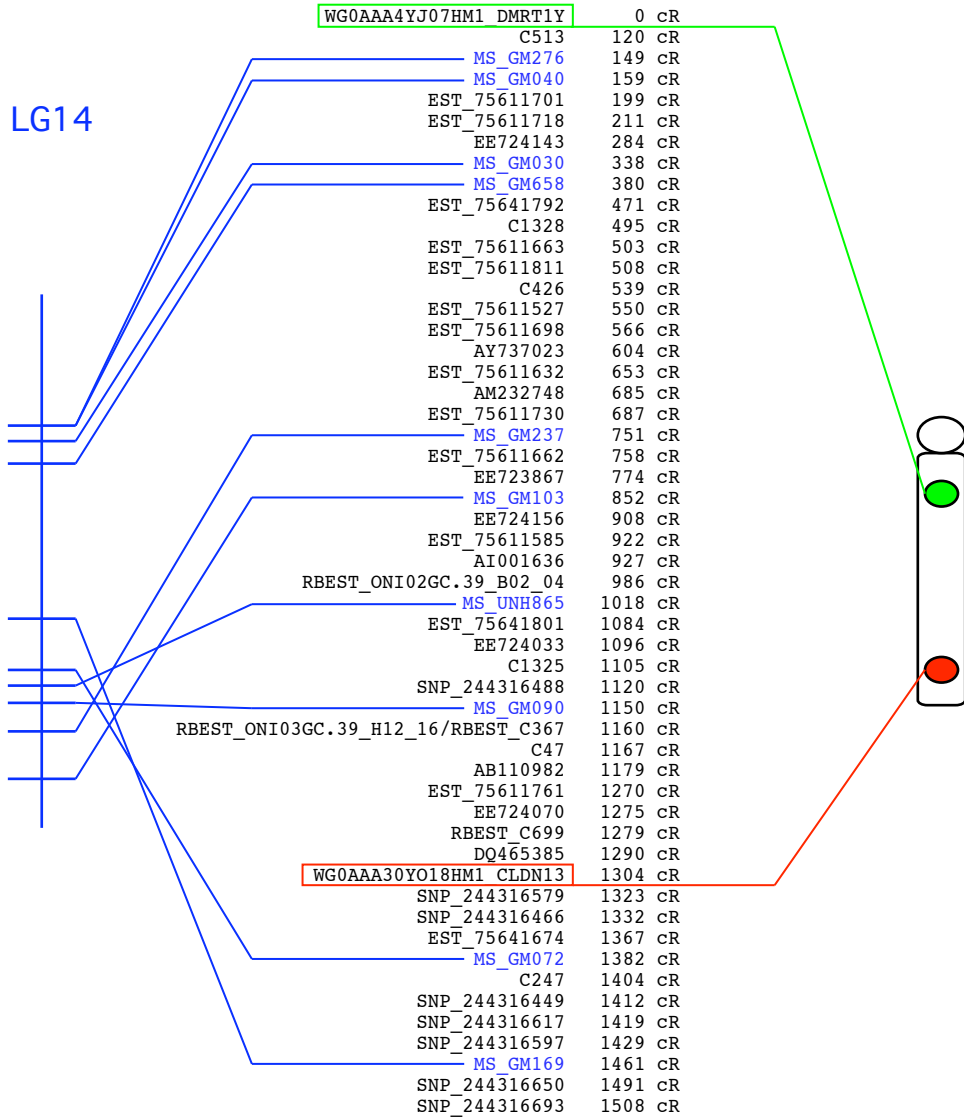

LG15

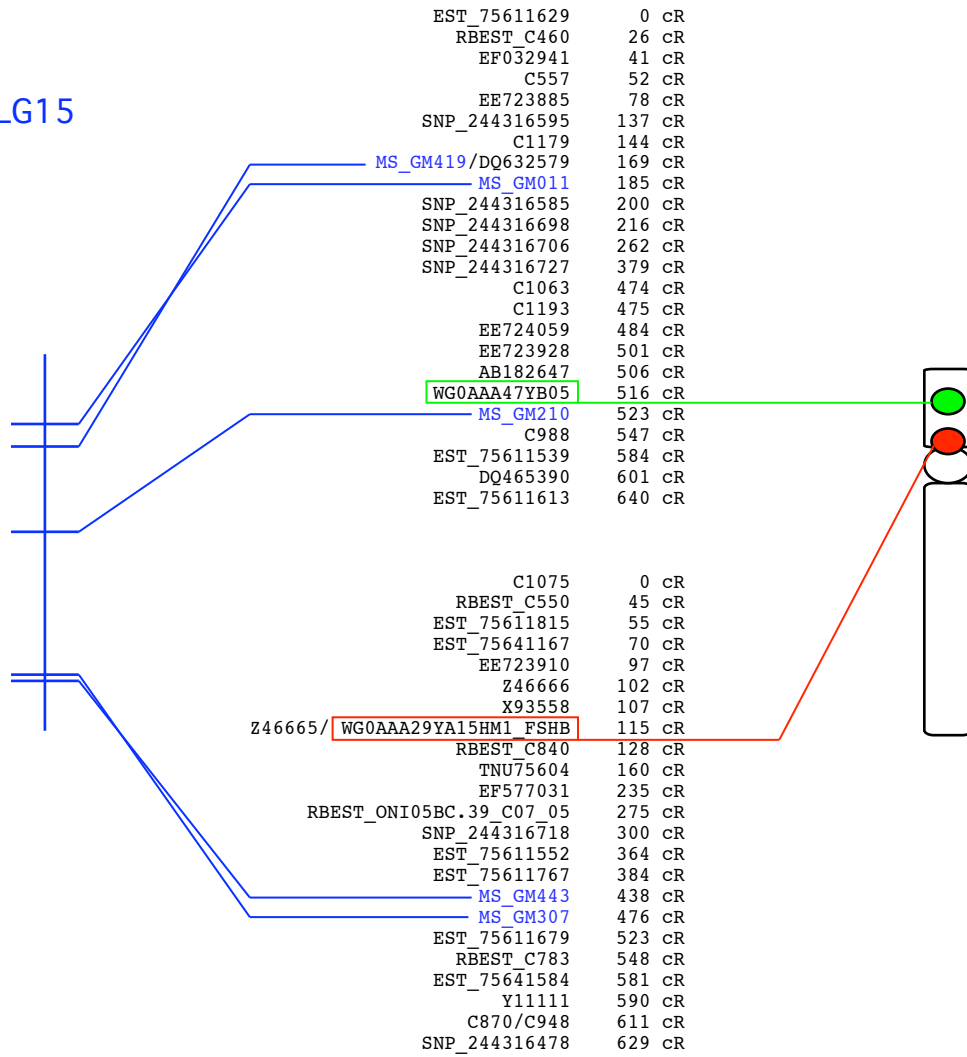

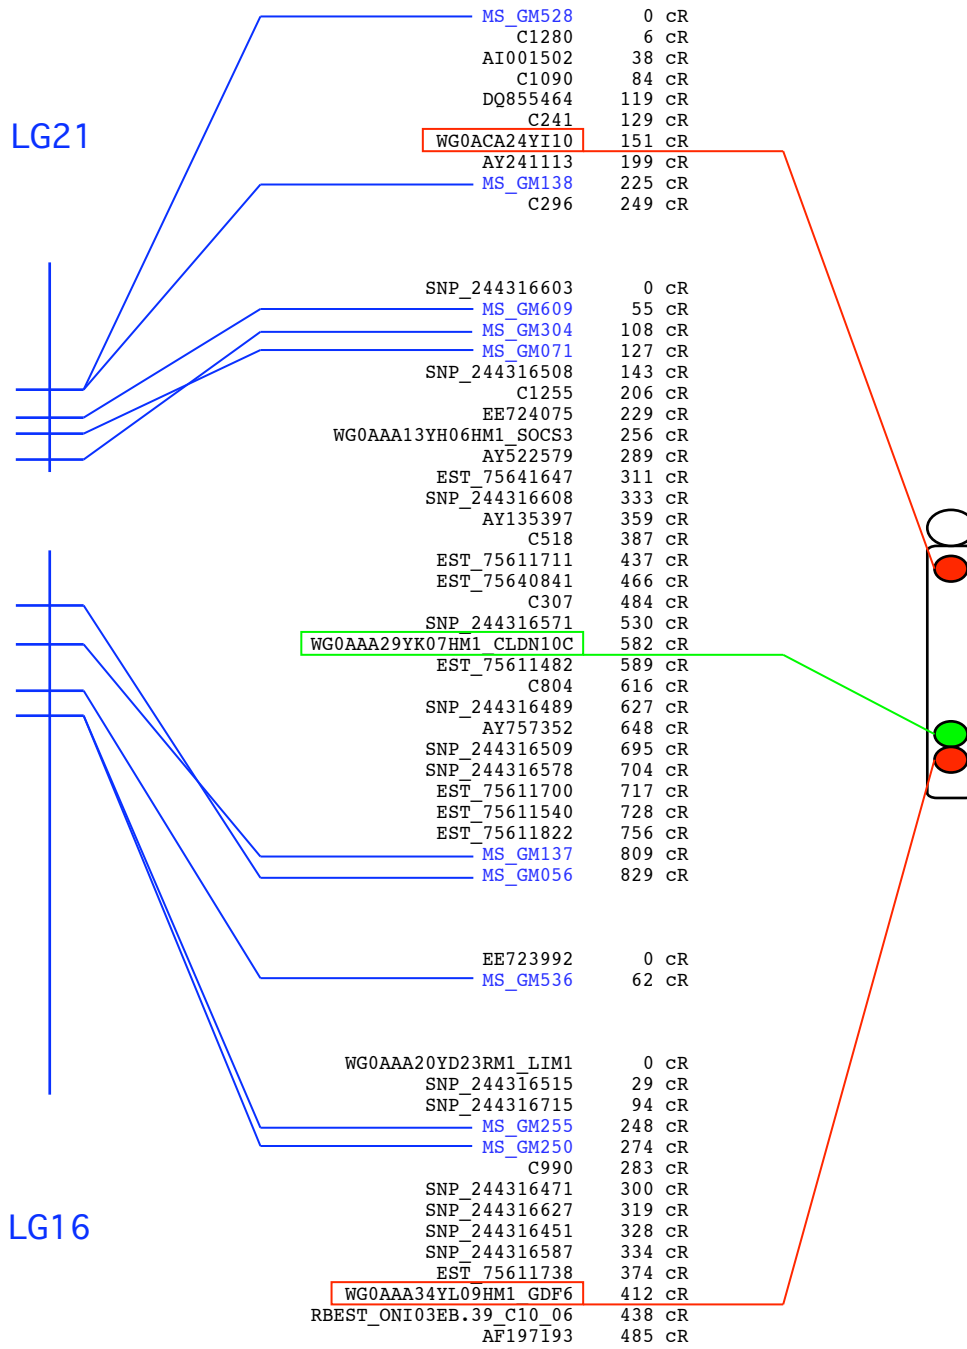



LG17

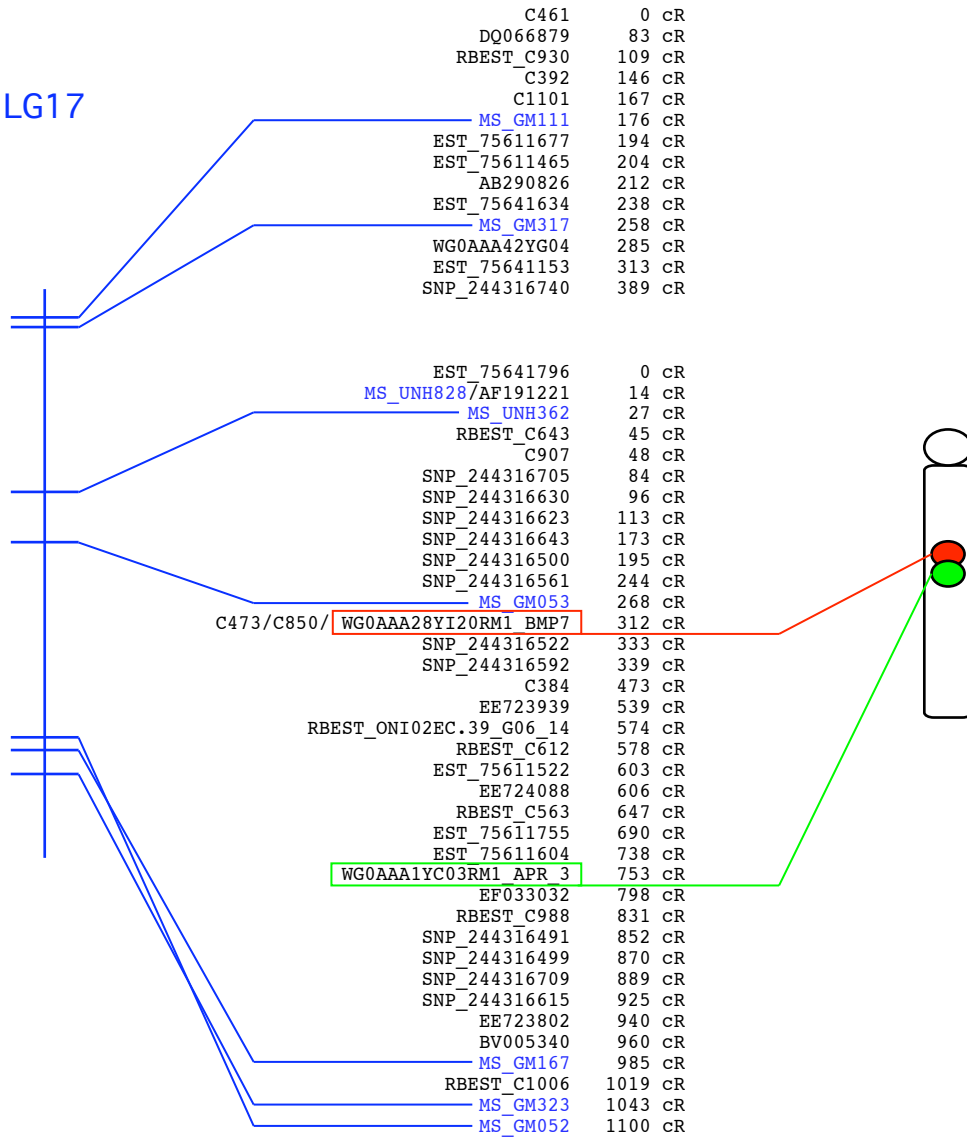

LG18

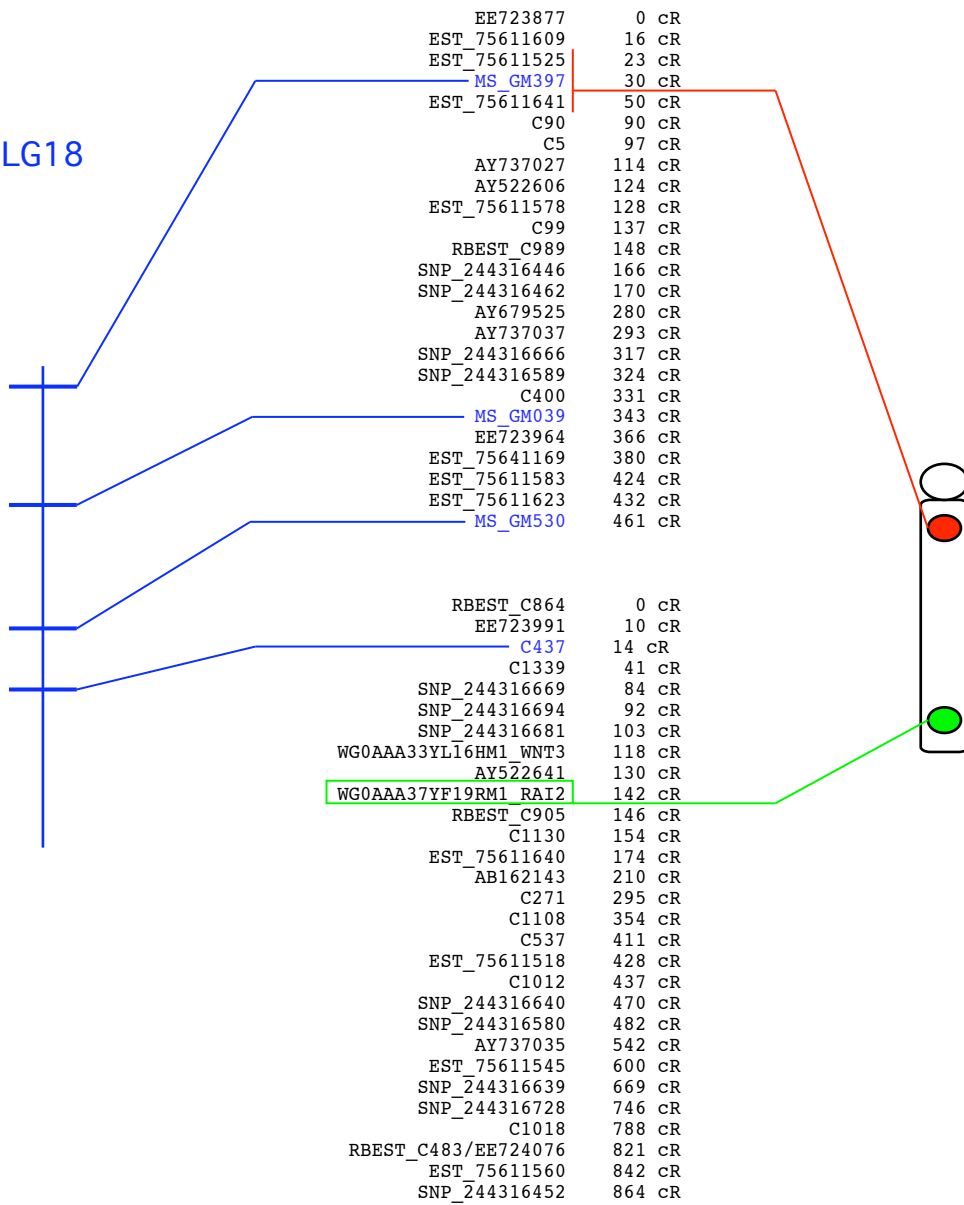

LG19

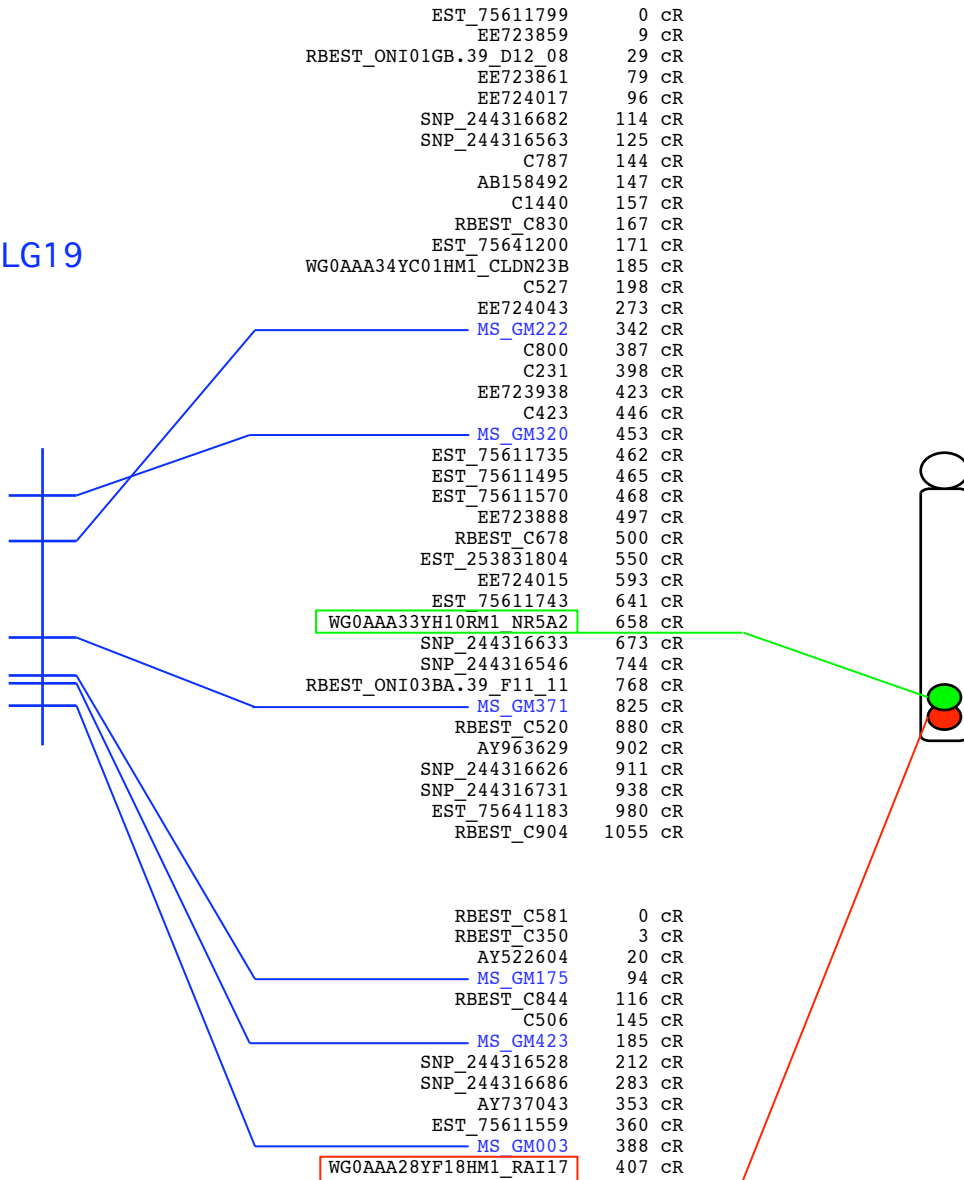

LG20

|                                  |     |    |
|----------------------------------|-----|----|
| EST_253831767                    | 0   | CR |
| C96                              | 31  | CR |
| SNP_244316472                    | 49  | CR |
| SNP_244316564                    | 51  | CR |
| SNP_244316591                    | 113 | CR |
| MS_GM120                         | 133 | CR |
| SNP_244316525                    | 0   | CR |
| SNP_244316675                    | 4   | CR |
| SNP_244316622                    | 34  | CR |
| SNP_244316554                    | 63  | CR |
| EST_75611517                     | 78  | CR |
| WG0AAA39YO12HM1 OTT              | 81  | CR |
| EE723995                         | 92  | CR |
| EE724039                         | 119 | CR |
| EST_75641627                     | 136 | CR |
| EST_75611611                     | 174 | CR |
| EST_75641152                     | 207 | CR |
| AY522610                         | 217 | CR |
| EST_75641660                     | 224 | CR |
| EE724127                         | 257 | CR |
| EST_75611612                     | 272 | CR |
| EST_75640840                     | 282 | CR |
| RBEST_ONI03EB.39_A01_01          | 347 | CR |
| EE723819                         | 391 | CR |
| C647                             | 404 | CR |
| EST_75611596                     | 415 | CR |
| C254/C371                        | 421 | CR |
| SNP_244316648                    | 484 | CR |
| C431                             | 0   | CR |
| RBEST_C652                       | 39  | CR |
| EST_75641172                     | 93  | CR |
| WG0AAA32YO06RM1 GATA5            | 149 | CR |
| DQ011052                         | 200 | CR |
| C1071                            | 217 | CR |
| RBEST_C397                       | 251 | CR |
| C586                             | 406 | CR |
| RBEST_C714                       | 439 | CR |
| EE723835                         | 442 | CR |
| C994                             | 452 | CR |
| AY757344                         | 465 | CR |
| EST_75611727                     | 494 | CR |
| EST_75611780                     | 497 | CR |
| WG0AAA30YN12HM1 CCA1             | 500 | CR |
| RBEST_C449                       | 510 | CR |
| RBEST_ONI02ED.39_E03_09/EE723898 | 534 | CR |
| EST_75611837                     | 550 | CR |
| AY513876                         | 576 | CR |
| SNP_244316519                    | 592 | CR |
| MS_GM417                         | 621 | CR |
| MS_GM125                         | 636 | CR |
| SNP_244316654                    | 657 | CR |
| EST_75641787                     | 716 | CR |
| RBEST_C767                       | 722 | CR |
| C252                             | 729 | CR |
| C1475                            | 756 | CR |

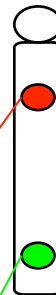

LG22

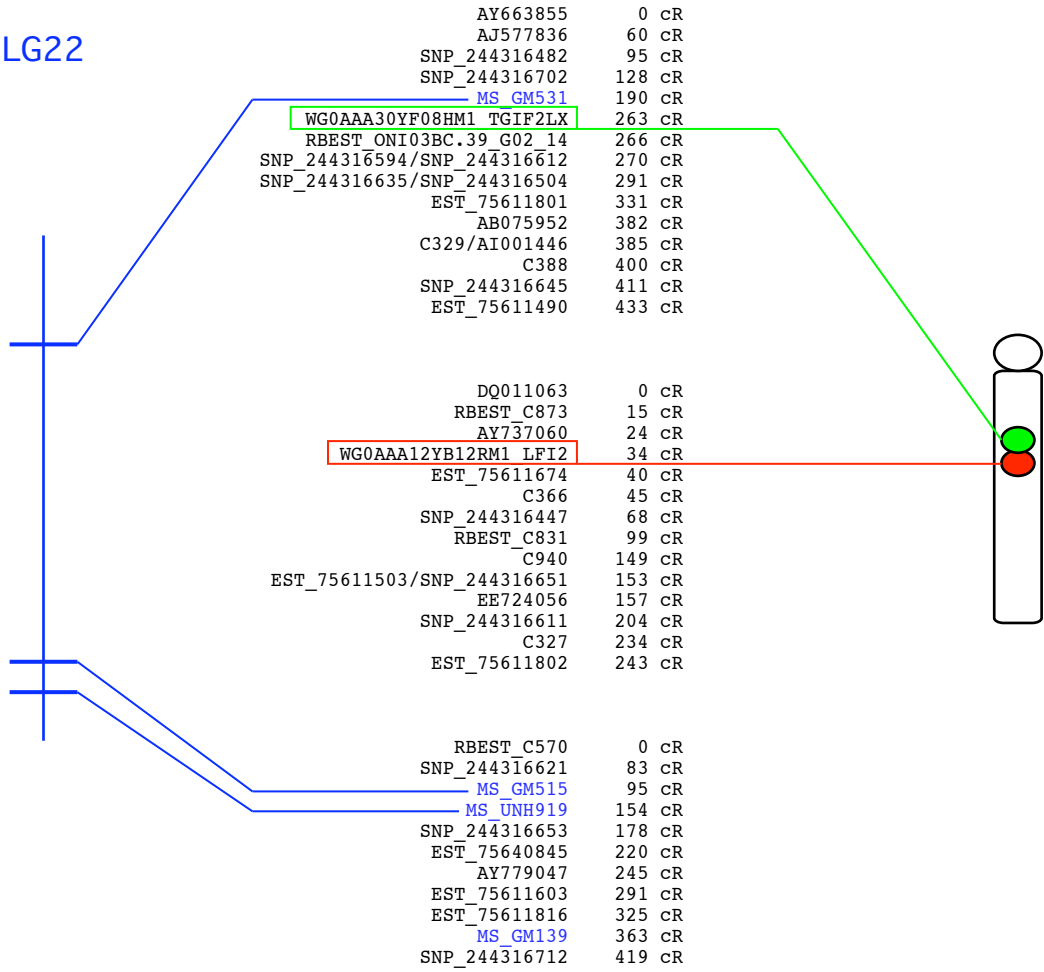

LG23

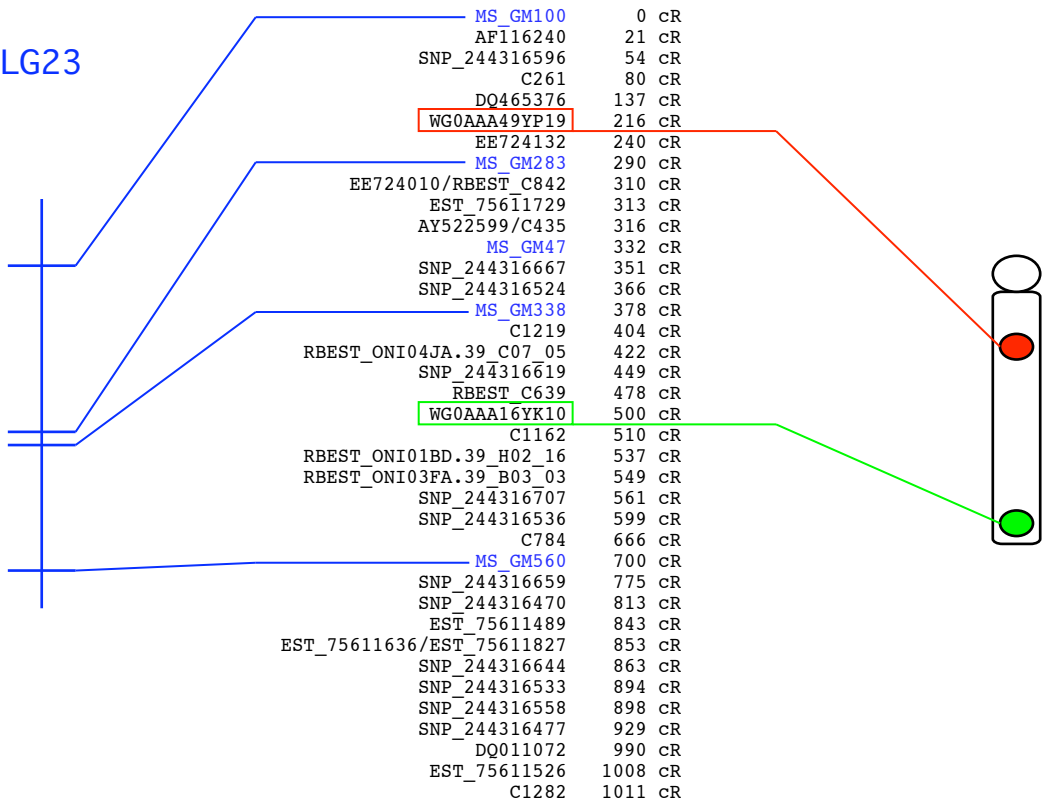

Supplement: 1471-2164-13-222-S4.pdf [file 1471-2164-13-222-S4.pdf]
